# Supplementary material for: Identification of Metabolites, Clinical Chemistry Markers and Transcripts Associated with Hepatotoxicity
Source: PubMed Central journal article supplement (PMC4023975; doi:10.1371/journal.pone.0097249), 2014-05-16
Supplement: pone.0097249.s005.pdf [file pone.0097249.s005.pdf]

# Treatments

- \* Amineptine
- △ ANIT
- + Cyclosporine A
- × Erythromycin
- ◇ Glibenclamide
- ▽ Methylene Dianiline
- ⊠ Phalloidin
- ⋄ Tetracycline
- Vehicle

# Taurocholic acid

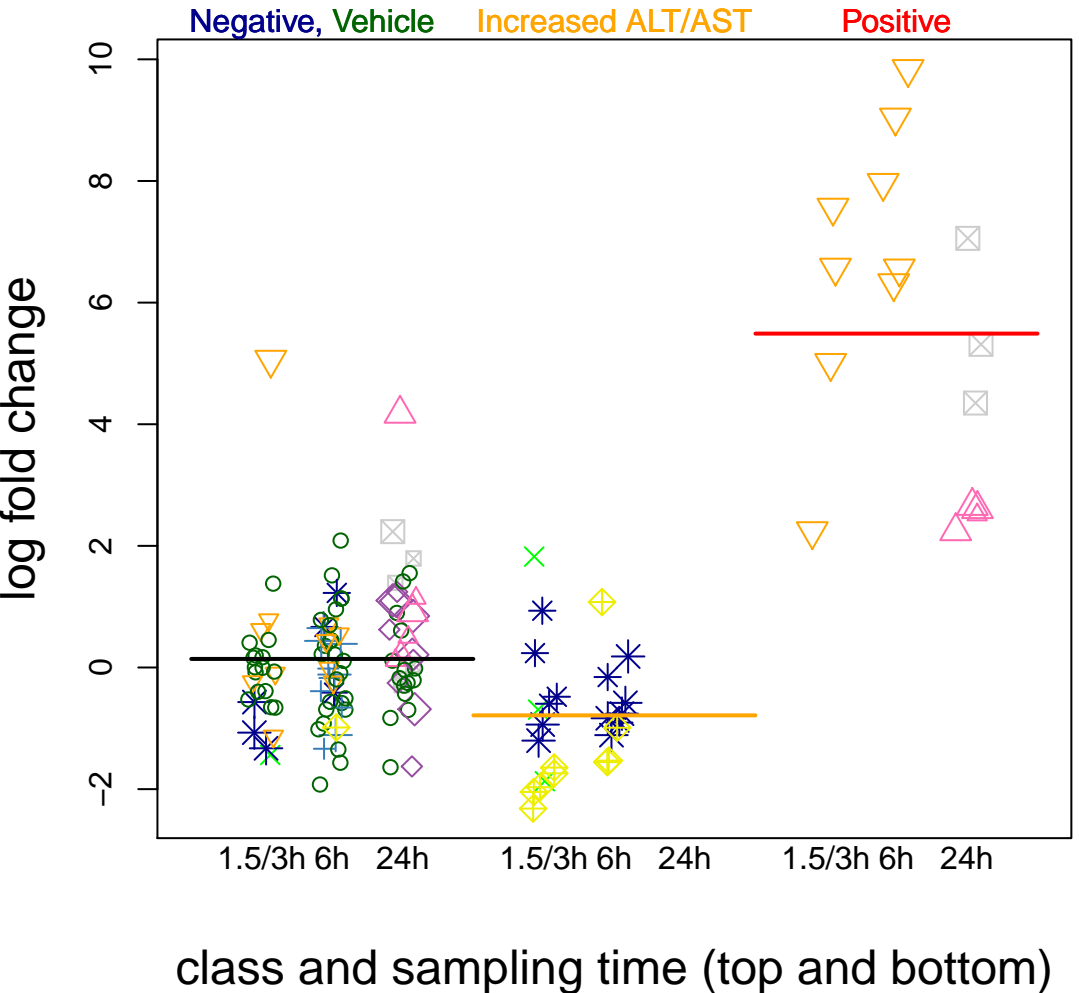

# Glycocholic acid

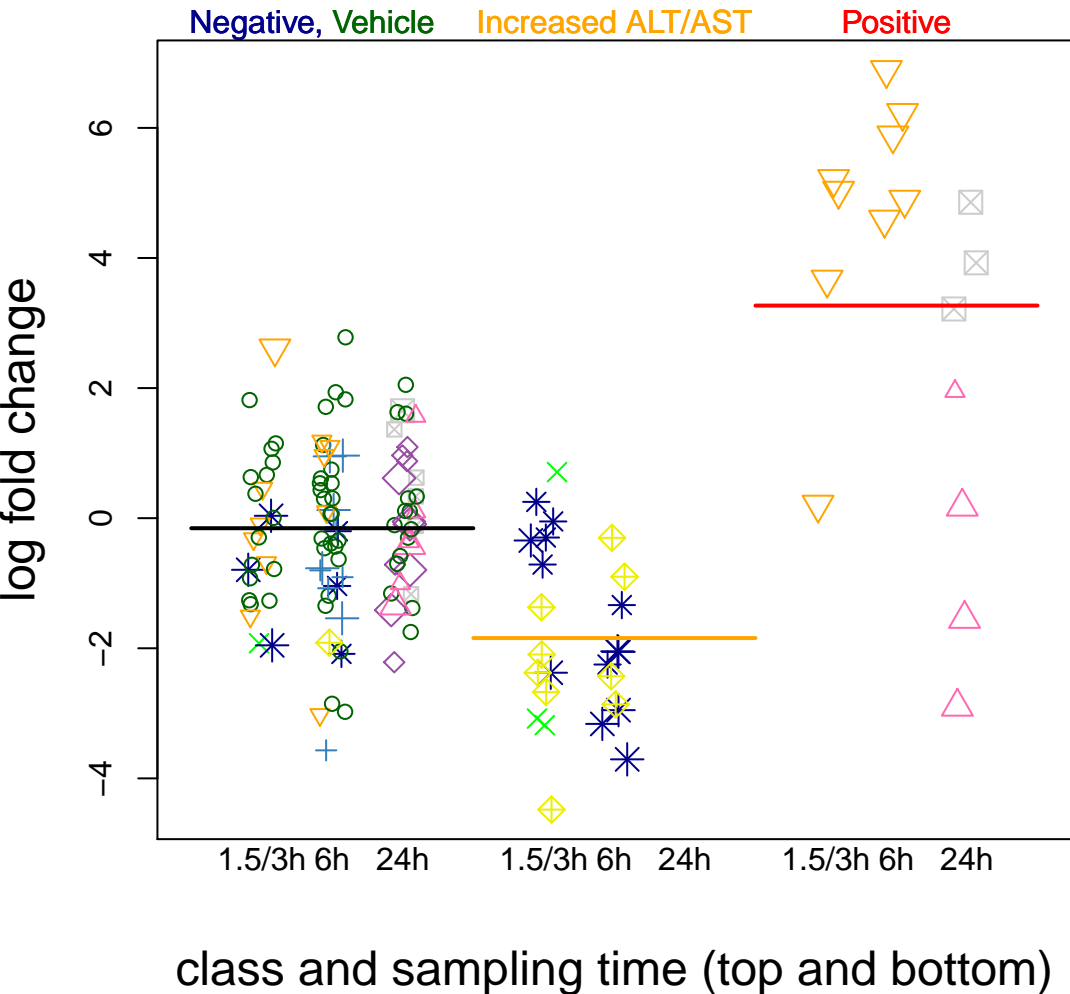

# Taurochenodeoxy.

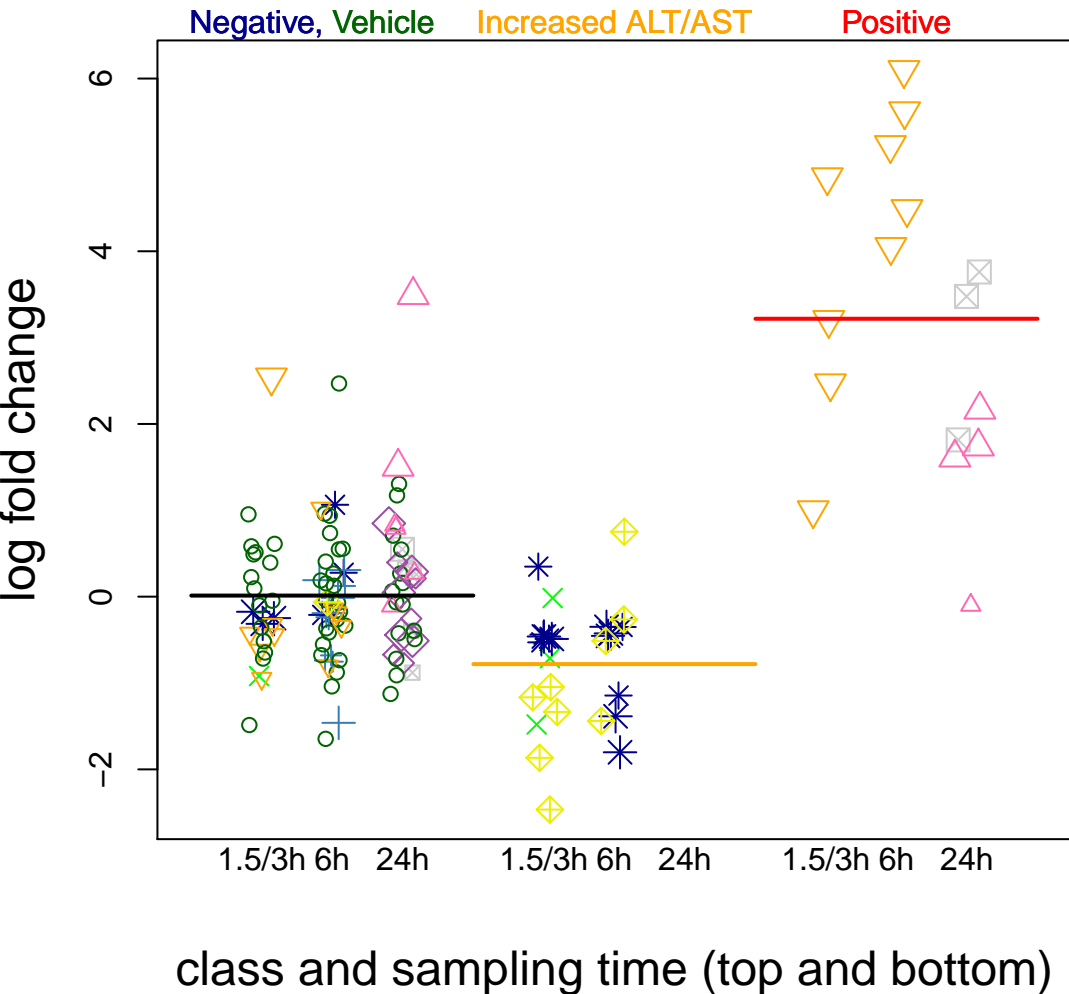

# Glucuronic acid

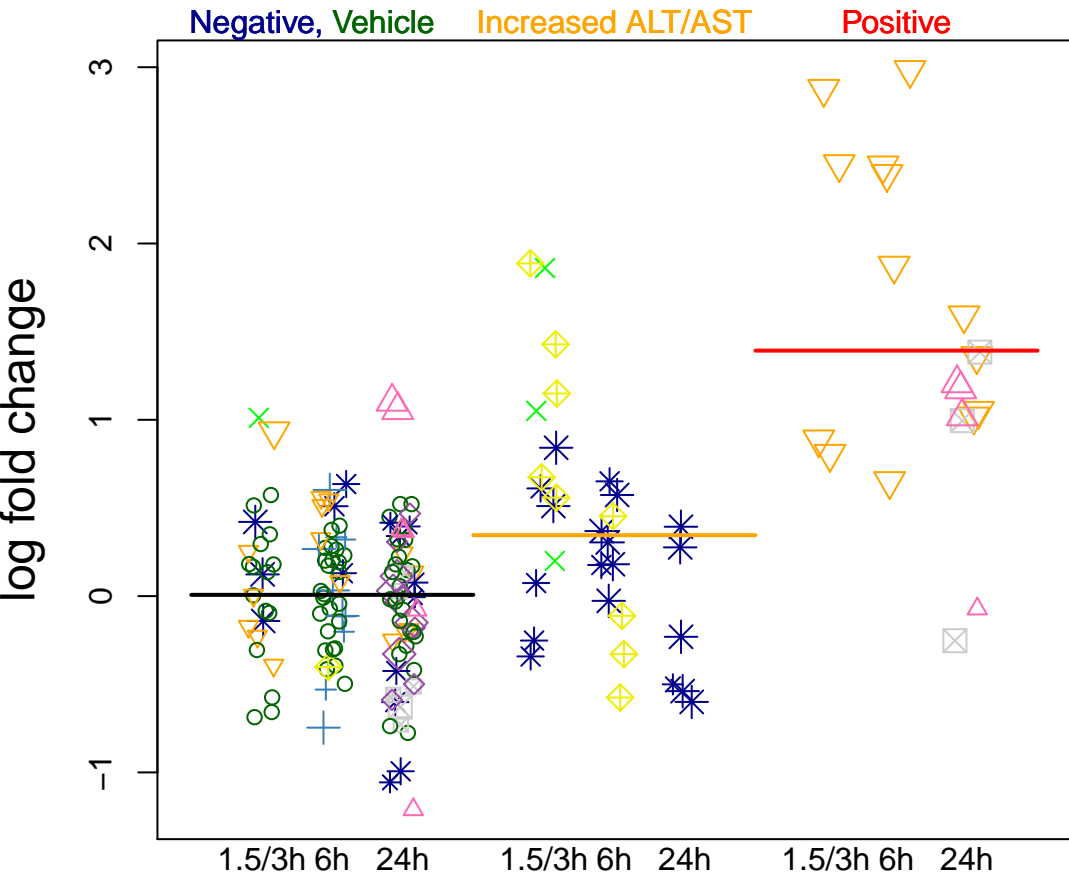

class and sampling time (top and bottom)

# Arginine

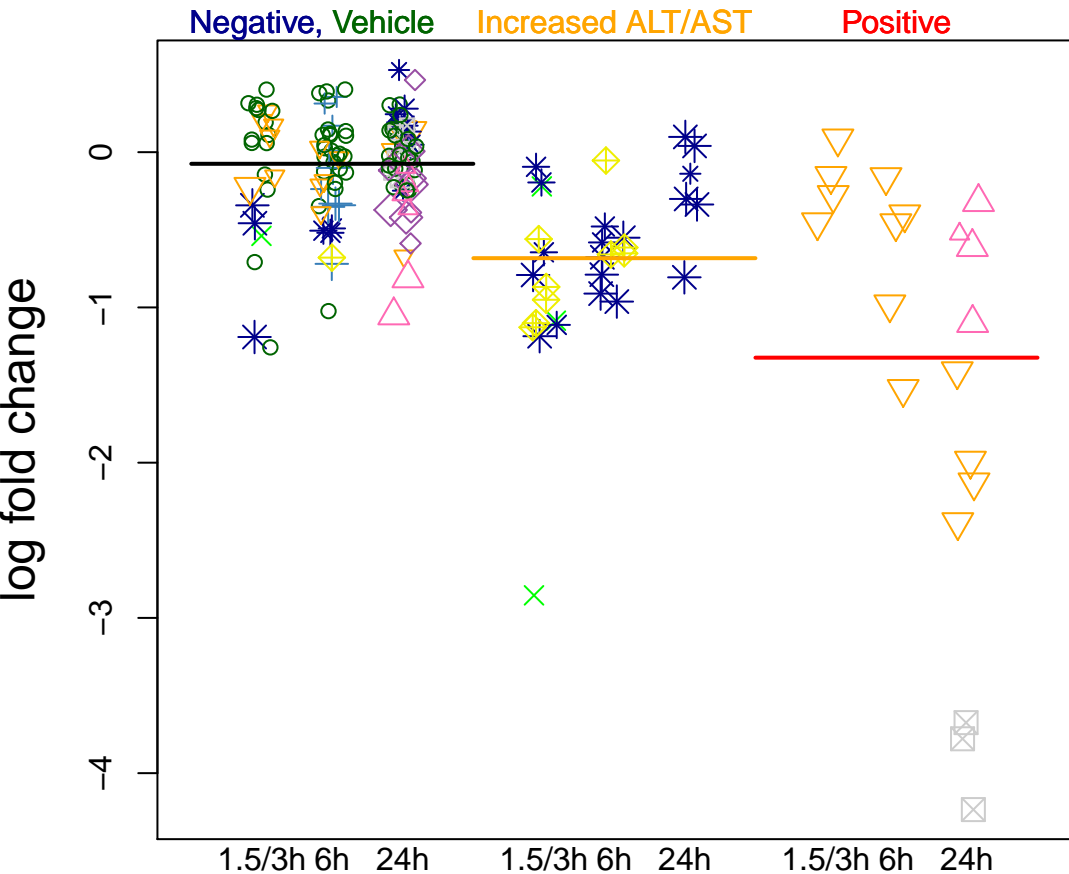

class and sampling time (top and bottom)
